# Supplementary material
Source: Springer Nature journal article supplement (https://www.springermedizin.de/resource/supplementary/13018_2010_271_MOESM7_ESM.pdf/9636672)
Supplement: MOESM7 [file 9636672]

| Reference                 | # cases | Follow-up<br>[Mts] | Ø-Age<br>[Years] | Constant<br>Score |
|---------------------------|---------|--------------------|------------------|-------------------|
| Ambacher et al [32]       | 27      | 42                 | 69               | <b>65</b>         |
| Becker et al [33]         | 27      | 45                 | 67               | <b>45</b>         |
| Boileau et al [12]        | 66      | 27                 | 66               | <b>56</b>         |
| Boileau et al [34]        | 43      | 29                 | 68               | <b>60</b>         |
| Bosch et al [1]           | 40      | 43                 | 68               | <b>54.2</b>       |
| Boss et al [17]           | 20      | 32                 | 77               | <b>52</b>         |
| Christoforakis et al [35] | 26      | 50                 | 65               | <b>70.4</b>       |
| Demirhan et al [18]       | 32      | 35                 | 58               | <b>68</b>         |
| Kollig et al [20]         | 46      | 62                 | 60               | <b>66</b>         |
| Kralinger et al [13]      | 167     | 29                 | 70               | <b>55.4</b>       |
| Reuther et al [36]        | 37      | 39                 | 71               | <b>46</b>         |
| Zyto et al [10]           | 36      | 12.4               | 72               | <b>57.5</b>       |
| Loew et al [25]           | 21      | 29.3               | 74.1             | <b>51.5</b>       |
| Mehlhorn et al [37]       | 26      | 17                 | 70.3             | <b>52</b>         |
| Grönhagen et al [19]      | 46      | 53                 | 72               | <b>42</b>         |
